# Supplementary material for: Establishment and characterization of 38 novel patient-derived primary cancer cell lines using multi-region sampling revealing intra-tumor heterogeneity of gallbladder carcinoma
Source: PubMed Central journal article supplement (PMC8057967; doi:10.1007/s13577-021-00492-5), 2021-04-04
Supplement: 13577_2021_492_MOESM2_ESM.pdf [file 13577_2021_492_MOESM2_ESM.pdf]

## Supplementary Tables

### Establishment and characterization of 38 novel patient-derived primary cancer cell lines using multi-region sampling revealing intra-tumor heterogeneity of gallbladder carcinoma

Feiling Feng<sup>1</sup>, Qingbao Cheng<sup>1</sup>, Bin Li<sup>2</sup>, Chen Liu<sup>1</sup>, Huizhen Wang<sup>2</sup>, Bin Li<sup>1</sup>, Xiaoya Xu<sup>2</sup>, Yong Yu<sup>1</sup>, Zishuo Chen<sup>2</sup>, Xiaobing Wu<sup>1</sup>, Hua Dong<sup>2</sup>, Kaijian Chu<sup>1</sup>, Zhenghua Xie<sup>2</sup>, Qingxiang Gao<sup>1</sup>, Lei Xiong<sup>2</sup>, Fugen Li<sup>2</sup>, Bin Yi<sup>1</sup>, Dadong Zhang<sup>2</sup>, Xiaoqing Jiang<sup>1</sup>

<sup>1</sup>Department of Biliary I, Shanghai Eastern Hepatobiliary Surgery Hospital, Navy Military Medical University, Shanghai 200438, China

<sup>2</sup>3D Medicines Inc., Shanghai 201114, China

Correspondence: Xiaoqing Jiang, e-mail: xqjiang\_dandaoyike@163.com; Dadong Zhang, e-mail: dadong.zhang@3dmedcare.com.

**Supplementary Table 1. Karyotype results of 38 GBC PDCs**

**Supplementary Table 2. STR results of 38 GBC PDCs**

**Supplementary Table 1. Karyotype results of 38 GBC PDCs**

| <b>PDC_ID</b> | <b>Identification results (karyotype)</b>                                               |
|---------------|-----------------------------------------------------------------------------------------|
| JXQ-3D-668R1  | 59; 60; 60; 60; 60; 61; 61; 61; 61; 62; 62; 62; 62; 62; 63; 63; 63; 63; 63; 63          |
| JXQ-3D-668R2  | 51; 54; 56; 58; 59; 59; 60; 60; 60; 60; 61; 61; 61; 61; 61; 62; 62; 63; 63; 63          |
| JXQ-3D-668R3  | 46; 46; 47; 48; 49; 50; 50; 51; 51; 51; 52; 54; 56; 56; 58; 58; 59; 60; 71; 80          |
| JXQ-3D-668R4  | 51; 52; 53; 56; 56; 59; 59; 59; 60; 61; 61; 62; 65; 69; 70; 73; 100; 111; 113           |
| JXQ-3D-1279R1 | 60; 60; 61; 61; 61; 62; 62; 62; 62; 62; 62; 63; 64; 64; 64; 65; 65; 66; 66; 68          |
| JXQ-3D-1279R2 | 62; 62; 62; 63; 63; 63; 63; 64; 64; 64; 65; 65; 66; 66; 66; 66; 67; 68; 68; 69          |
| JXQ-3D-1279R3 | 59; 59; 60; 61; 62; 63; 63; 63; 64; 64; 64; 65; 65; 65; 65; 66; 66; 67; 67; 67          |
| JXQ-3D-1279R4 | 58; 60; 62; 64; 65; 65; 67; 67; 68; 69; 71; 72; 73; 73; 74; 74; 93; 104; 128; 129       |
| JXQ-3D-1279R5 | 48; 56; 58; 59; 59; 63; 65; 65; 66; 66; 66; 66; 66; 66; 67; 68; 104; 105; 110; 112; 118 |
| JXQ-3D-1279R6 | 58; 59; 59; 59; 60; 61; 61; 61; 62; 62; 62; 63; 64; 64; 64; 64; 65; 67; 68; 69          |
| JXQ-3D-1279R7 | 58; 61; 62; 62; 62; 62; 60; 64; 64; 65; 65; 65; 65; 66; 66; 66; 66; 67; 67; 70          |
| JXQ-3D-1279R8 | 57; 59; 61; 62; 63; 63; 63; 64; 64; 65; 66; 67; 67; 68; 68; 68; 68; 68; 71; 72          |
| JXQ-3D-1279R9 | 59; 62; 63; 64; 65; 65; 67; 68; 74; 75; 76; 77; 79; 79; 86; 88; 94; 103; 107; 110       |
| JXQ-3D-1405R1 | 59; 60; 62; 64; 64; 64; 66; 66; 67; 67; 67; 68; 68; 68; 69; 69; 69; 70; 70; 73          |
| JXQ-3D-1405R2 | 56; 56; 57; 60; 60; 61; 62; 62; 63; 63; 63; 63; 64; 64; 66; 66; 67; 67; 68; 68          |
| JXQ-3D-1405R3 | 61; 61; 62; 62; 62; 63; 63; 63; 63; 64; 64; 64; 66; 66; 66; 66; 66; 66; 70              |
| JXQ-3D-1405R4 | 55; 55; 55; 55; 56; 56; 58; 58; 58; 59; 59; 59; 59; 59; 59; 59; 60; 60; 60; 63          |
| JXQ-3D-1436R1 | 68; 69; 70; 70; 71; 71; 71; 71; 72; 73; 73; 73; 73; 74; 74; 74; 75; 76; 76; 77          |
| JXQ-3D-1436R2 | 58; 58; 59; 60; 63; 64; 64; 64; 64; 65; 65; 66; 67; 67; 68; 68; 69; 69; 70; 71          |
| JXQ-3D-1436R3 | 52; 54; 54; 55; 58; 58; 62; 62; 62; 64; 66; 70; 70; 70; 70; 70; 74; 76; 78; 78          |
| JXQ-3D-1436R4 | 60; 60; 61; 61; 62; 62; 63; 63; 63; 64; 65; 65; 67; 67; 69; 70; 71; 72; 73; 75          |
| JXQ-3D-1436R5 | 64; 64; 64; 66; 66; 66; 66; 67; 67; 67; 68; 68; 68; 69; 69; 71; 73; 73; 73; 73          |
| JXQ-3D-1436R6 | 51; 54; 55; 58; 59; 59; 59; 60; 61; 62; 62; 62; 63; 63; 64; 64; 65; 69; 71; 73          |
| JXQ-3D-902R1  | 66; 67; 69; 69; 70; 71; 71; 71; 72; 72; 72; 72; 72; 73; 73; 75; 75; 76; 77; 77          |
| JXQ-3D-902R2  | 60; 62; 62; 64; 64; 64; 65; 65; 66; 66; 67; 67; 68; 68; 68; 68; 68; 68; 69              |
| JXQ-3D-902R3  | 54; 56; 57; 58; 59; 60; 61; 61; 62; 62; 63; 64; 66; 66; 68; 73; 86; 90; 90; 96          |
| JXQ-3D-902R4  | 70; 71; 71; 71; 71; 72; 72; 73; 74; 75; 75; 76; 76; 78; 80; 80; 80; 80; 81; 83          |
| JXQ-3D-902R5  | 62; 65; 65; 69; 71; 72; 73; 75; 77; 77; 78; 80; 80; 81; 81; 81; 83; 84; 84; 85          |
| JXQ-3D-902R6  | 54; 55; 56; 56; 58; 58; 60; 60; 61; 62; 62; 63; 63; 63; 64; 65; 65; 65; 66; 67          |
| JXQ-3D-902R7  | 59; 60; 61; 62; 63; 63; 63; 65; 65; 65; 66; 67; 67; 68; 68; 68; 70; 70; 71; 71          |
| JXQ-3D-902R8  | 59; 60; 60; 60; 61; 61; 61; 61; 61; 62; 62; 63; 64; 65; 65; 66; 68; 68; 68              |
| JXQ-3D-902R9  | 62; 63; 64; 65; 66; 66; 66; 67; 67; 69; 70; 70; 71; 71; 71; 71; 72; 72; 72; 74          |
| JXQ-3D-4160R1 | 53; 56; 57; 59; 64; 64; 65; 65; 66; 67; 67; 68; 69; 71; 71; 72; 72; 72; 73; 73          |
| JXQ-3D-4160R2 | 65; 67; 69; 71; 71; 71; 71; 73; 73; 73; 74; 74; 75; 76; 76; 76; 78; 78; 79; 79          |
| JXQ-3D-4160R3 | 61; 66; 67; 69; 71; 71; 72; 73; 73; 75; 75; 75; 77; 78; 78; 80; 80; 80; 86; 86          |
| JXQ-3D-4256R1 | 46; 46; 46; 47; 47; 47; 48; 49; 50; 51; 51; 51; 52; 52; 53; 54; 54; 54; 56; 56          |
| JXQ-3D-4256R2 | 46; 48; 48; 48; 49; 51; 51; 51; 52; 54; 55; 56; 56; 56; 57; 58; 58; 59; 59; 63          |
| JXQ-3D-4256R3 | 47; 49; 49; 50; 54; 54; 54; 56; 56; 56; 61; 63; 65; 70; 72; 84; 88; 90; 97; 100         |



| Marker  | JXQ-3D-1405R4 |         | JXQ-3D-1436R1 |         | JXQ-3D-1436R2 |         | JXQ-3D-1436R3 |         |
|---------|---------------|---------|---------------|---------|---------------|---------|---------------|---------|
|         | Allele1       | Allele2 | Allele1       | Allele2 | Allele1       | Allele2 | Allele1       | Allele2 |
| D5S818  | 11            | 12      | 11            | 12      | 11            | 12      | 11            | 12      |
| D13S317 | 11            | 12      | 8             | 10      | 8             | 10      | 8             | 10      |
| D7S820  | 8             | 12      | 12            | 12      | 12            | 12      | 12            | 12      |
| D16S539 | 9             | 10      | 9             | 10      | 9             | 10      | 9             | 10      |
| VWA     | 14            | 18      | 16            | 18      | 16            | 18      | 16            | 18      |
| TH01    | 9             | 9       | 9             | 9       | 9             | 9       | 9             | 9       |
| AMEL    | X             | X       | X             | Y       | X             | Y       | X             | Y       |
| TPOX    | 8             | 11      | 8             | 11      | 8             | 11      | 8             | 11      |
| CSF1PO  | 9             | 13      | 10            | 10      | 10            | 10      | 10            | 10      |
| D12S391 | 18            | 18      | 15            | 17      | 15            | 17      | 15            | 17      |
| FGA     | 21            | 25      | 23            | 24      | 23            | 24      | 23            | 24      |
| D2S1338 | 22            | 23      | 17            | 25      | 17            | 25      | 17            | 25      |
| D21S11  | 30            | 30      | 29            | 31      | 29            | 31      | 29            | 31      |
| D18S51  | 12            | 17      | 14            | 14      | 14            | 14      | 14            | 14      |
| D8S1179 | 10            | 13      | 13            | 13      | 13            | 13      | 13            | 13      |
| D3S1358 | 15            | 17      | 15            | 16      | 15            | 16      | 15            | 16      |
| D6S1043 | 19            | 19      | 17            | 20      | 17            | 20      | 17            | 20      |
| PENTAE  | 17            | 19      | 5             | 16      | 5             | 16      | 5             | 16      |
| D19S433 | 12            | 13      | 13            | 15      | 13            | 15      | 13            | 15      |
| PENTAD  | 9             | 9       | 10            | 11      | 10            | 11      | 10            | 11      |

| Marker  | JXQ-3D-1436R4 |         | JXQ-3D-1436R5 |         | JXQ-3D-1436R6 |         | JXQ-3D-902R1 |         |
|---------|---------------|---------|---------------|---------|---------------|---------|--------------|---------|
|         | Allele1       | Allele2 | Allele1       | Allele2 | Allele1       | Allele2 | Allele1      | Allele2 |
| D5S818  | 11            | 12      | 11            | 12      | 11            | 12      | 11           | 12      |
| D13S317 | 8             | 10      | 8             | 10      | 8             | 10      | 9            | 11      |
| D7S820  | 12            | 12      | 12            | 12      | 12            | 12      | 8            | 12      |
| D16S539 | 9             | 10      | 9             | 10      | 9             | 10      | 10           | 11      |
| VWA     | 16            | 18      | 16            | 18      | 16            | 18      | 16           | 19      |
| TH01    | 9             | 9       | 9             | 9       | 9             | 9       | 9            | 9       |
| AMEL    | X             | Y       | X             | Y       | X             | Y       | X            | X       |
| TPOX    | 8             | 11      | 8             | 11      | 8             | 11      | 8            | 12      |
| CSF1PO  | 10            | 10      | 10            | 10      | 10            | 10      | 12           | 12      |
| D12S391 | 15            | 17      | 15            | 17      | 15            | 17      | 20           | 20      |
| FGA     | 23            | 24      | 23            | 24      | 23            | 24      | 25           | 25      |
| D2S1338 | 17            | 25      | 17            | 25      | 17            | 25      | 19           | 23      |
| D21S11  | 29            | 31      | 29            | 31      | 29            | 31      | 31           | 32      |
| D18S51  | 14            | 14      | 14            | 14      | 14            | 14      | 17           | 19      |
| D8S1179 | 13            | 13      | 13            | 13      | 13            | 13      | 13           | 14      |
| D3S1358 | 15            | 16      | 15            | 16      | 15            | 16      | 15           | 15      |
| D6S1043 | 17            | 20      | 17            | 20      | 17            | 20      | 11           | 11      |
| PENTAE  | 5             | 16      | 5             | 16      | 5             | 16      | 12           | 12      |
| D19S433 | 13            | 15      | 13            | 15      | 13            | 15      | 15.2         | 15.2    |
| PENTAD  | 10            | 11      | 10            | 11      | 10            | 11      | 8            | 13      |

| Marker  | JXQ-3D-4160R1 |         | JXQ-3D-4160R2 |         | JXQ-3D-4160R3 |         |
|---------|---------------|---------|---------------|---------|---------------|---------|
|         | Allele1       | Allele2 | Allele1       | Allele2 | Allele1       | Allele2 |
| D5S818  | 10            | 12      | 11            | 12      | 11            | 12      |
| D13S317 | 8             | 8       | 8             | 11      | 8             | 8       |
| D7S820  | 11            | 11      | 11            | 11      | 11            | 11      |
| D16S539 | 10            | 13      | 10            | 11      | 10            | 13      |
| VWA     | 14            | 16      | 14            | 16      | 14            | 16      |
| TH01    | 9             | 9       | 9             | 9       | 9             | 9       |
| AMEL    | X             | X       | X             | X       | X             | X       |
| TPOX    | 8             | 11      | 8             | 11      | 8             | 11      |
| CSF1PO  | 10            | 13      | 10            | 13      | 10            | 13      |
| D12S391 | 19            | 19      | 19            | 21      | 19            | 19      |
| FGA     | 22            | 23      | 22            | 23      | 22            | 23      |
| D2S1338 | 20            | 23      | 20            | 23      | 20            | 23      |
| D21S11  | 28            | 33.2    | 28            | 33.2    | 28            | 33.2    |
| D18S51  | 19            | 19      | 11            | 15      | 19            | 19      |
| D8S1179 | 13            | 16      | 13            | 16      | 13            | 16      |
| D3S1358 | 15            | 18      | 15            | 18      | 15            | 18      |
| D6S1043 | 13            | 20      | 13            | 18      | 13            | 20      |
| PENTAE  | 11            | 15      | 11            | 15      | 11            | 15      |
| D19S433 | 14            | 15.2    | 13            | 14      | 14            | 15.2    |
| PENTAD  | 10            | 13      | 10            | 13      | 10            | 13      |

| Marker  | JXQ-3D-4525R1 |         | JXQ-3D-4525R2 |         | JXQ-3D-4160R3 |         |
|---------|---------------|---------|---------------|---------|---------------|---------|
|         | Allele1       | Allele2 | Allele1       | Allele2 | Allele1       | Allele2 |
| D5S818  | 11            | 11      | 11            | 11      | 11            | 12      |
| D13S317 | 9             | 9       | 9             | 9       | 8             | 8       |
| D7S820  | 8             | 11      | 8             | 11      | 11            | 11      |
| D16S539 | 10            | 10      | 10            | 10      | 10            | 13      |
| VWA     | 15            | 18      | 15            | 18      | 14            | 16      |
| TH01    | 7             | 7       | 7             | 7       | 9             | 9       |
| AMEL    | X             | X       | X             | X       | X             | X       |
| TPOX    | 8             | 8       | 8             | 8       | 8             | 11      |
| CSF1PO  | 10            | 10      | 10            | 10      | 10            | 13      |
| D12S391 | 18            | 18      | 18            | 18      | 19            | 19      |
| FGA     | 20            | 20      | 20            | 20      | 22            | 23      |
| D2S1338 | 17            | 17      | 17            | 18      | 20            | 23      |
| D21S11  | 31.2          | 31.2    | 31.2          | 31.2    | 28            | 33.2    |
| D18S51  | 20            | 20      | 20            | 20      | 19            | 19      |
| D8S1179 | 13            | 15      | 13            | 13      | 13            | 16      |
| D3S1358 | 15            | 15      | 15            | 15      | 15            | 18      |
| D6S1043 | 18            | 18      | 14            | 18      | 13            | 20      |
| PENTAE  | 11            | 19      | 11            | 19      | 11            | 15      |
| D19S433 | 14.2          | 14.2    | 14.2          | 14.2    | 14            | 15.2    |
| PENTAD  | 9             | 11      | 9             | 11      | 10            | 13      |



| Marker  | JXQ-3D-902R2 |         | JXQ-3D-902R3 |         | JXQ-3D-902R4 |         | JXQ-3D-902R5 |         |
|---------|--------------|---------|--------------|---------|--------------|---------|--------------|---------|
|         | Allele1      | Allele2 | Allele1      | Allele2 | Allele1      | Allele2 | Allele1      | Allele2 |
| D5S818  | 11           | 12      | 11           | 12      | 11           | 12      | 11           | 12      |
| D13S317 | 9            | 11      | 9            | 11      | 9            | 11      | 11           | 11      |
| D7S820  | 8            | 12      | 8            | 12      | 8            | 12      | 8            | 12      |
| D16S539 | 10           | 11      | 10           | 11      | 10           | 11      | 10           | 11      |
| VWA     | 19           | 19      | 19           | 19      | 19           | 19      | 19           | 19      |
| TH01    | 9            | 9       | 9            | 9       | 9            | 9       | 9            | 9       |
| AMEL    | X            | X       | X            | X       | X            | X       | X            | X       |
| TPOX    | 8            | 12      | 8            | 12      | 8            | 12      | 8            | 12      |
| CSF1PO  | 12           | 12      | 12           | 12      | 12           | 12      | 12           | 12      |
| D12S391 | 20           | 20      | 20           | 20      | 20           | 20      | 20           | 20      |
| FGA     | 25           | 25      | 25           | 25      | 25           | 25      | 25           | 25      |
| D2S1338 | 19           | 23      | 19           | 23      | 19           | 23      | 19           | 19      |
| D21S11  | 31           | 32      | 31           | 32      | 31           | 32      | 31           | 32      |
| D18S51  | 17           | 19      | 17           | 19      | 17           | 19      | 17           | 19      |
| D8S1179 | 13           | 14      | 13           | 14      | 13           | 13      | 13           | 14      |
| D3S1358 | 15           | 15      | 15           | 15      | 15           | 15      | 15           | 15      |
| D6S1043 | 11           | 11      | 11           | 11      | 11           | 11      | 11           | 11      |
| PENTAE  | 12           | 12      | 12           | 12      | 12           | 12      | 12           | 13      |
| D19S433 | 15.2         | 15.2    | 15.2         | 15.2    | 15.2         | 15.2    | 15.2         | 15.2    |
| PENTAD  | 8            | 13      | 8            | 13      | 8            | 13      | 8            | 13      |

| Marker  | JXQ-3D-902R6 |         | JXQ-3D-902R7 |         | JXQ-3D-902R8 |         | JXQ-3D-902R9 |         |
|---------|--------------|---------|--------------|---------|--------------|---------|--------------|---------|
|         | Allele1      | Allele2 | Allele1      | Allele2 | Allele1      | Allele2 | Allele1      | Allele2 |
| D5S818  | 11           | 12      | 11           | 12      | 11           | 12      | 11           | 12      |
| D13S317 | 9            | 11      | 9            | 11      | 9            | 11      | 9            | 11      |
| D7S820  | 8            | 12      | 8            | 12      | 8            | 12      | 8            | 12      |
| D16S539 | 10           | 11      | 10           | 11      | 10           | 11      | 10           | 11      |
| VWA     | 19           | 19      | 19           | 19      | 19           | 19      | 19           | 19      |
| TH01    | 9            | 9       | 9            | 9       | 9            | 9       | 9            | 9       |
| AMEL    | X            | X       | X            | X       | X            | X       | X            | X       |
| TPOX    | 8            | 12      | 8            | 12      | 8            | 12      | 8            | 12      |
| CSF1PO  | 12           | 12      | 12           | 12      | 12           | 12      | 12           | 12      |
| D12S391 | 20           | 20      | 20           | 20      | 20           | 20      | 20           | 20      |
| FGA     | 25           | 25      | 25           | 25      | 25           | 25      | 25           | 25      |
| D2S1338 | 19           | 23      | 19           | 23      | 19           | 23      | 19           | 23      |
| D21S11  | 31           | 32      | 31           | 32      | 31           | 32      | 31           | 32      |
| D18S51  | 17           | 19      | 17           | 19      | 17           | 19      | 17           | 19      |
| D8S1179 | 13           | 14      | 13           | 14      | 13           | 14      | 13           | 14      |
| D3S1358 | 15           | 15      | 15           | 15      | 15           | 15      | 15           | 15      |
| D6S1043 | 11           | 11      | 11           | 11      | 11           | 11      | 11           | 11      |
| PENTAE  | 12           | 12      | 12           | 12      | 12           | 12      | 12           | 12      |
| D19S433 | 15.2         | 15.2    | 15.2         | 15.2    | 15.2         | 15.2    | 15.2         | 15.2    |
| PENTAD  | 8            | 13      | 8            | 13      | 8            | 13      | 8            | 13      |
